# Supplementary material for: A novel drug–drug coamorphous system without molecular interactions: improve the physicochemical properties of tadalafil and repaglinide
Source: PubMed Central journal article supplement — RSC Adv. 2020 Jan 2;10(1):565–83. doi: 10.1039/c9ra07149k (PMC9048229; doi:10.1039/c9ra07149k), 2020-01-02
Supplement: RA-010-C9RA07149K-s001.pdf [file RA-010-C9RA07149K-s001.pdf]

## Supplementary materials

### **A Novel Drug-Drug Coamorphous System without Molecular Interactions: Improve the Physicochemical Properties of Tadalafil and Repaglinide**

Meiling Su<sup>a#</sup>, Yanming Xia<sup>b#</sup>, Yajing Shen<sup>b</sup>, Weili Heng<sup>a</sup>, Yuanfeng Wei<sup>b</sup>, Linghe Zhang<sup>c</sup>, Yuan Gao<sup>b</sup>, Jianjun Zhang<sup>a\*</sup>, Shuai Qian<sup>b\*</sup>

<sup>a</sup> School of Pharmacy, China Pharmaceutical University, Nanjing, 211198, P.R., China

<sup>b</sup> School of Traditional Chinese Pharmacy, China Pharmaceutical University, Nanjing, 211198, P.R., China

<sup>c</sup> Department of Chemistry, Smith College, Northampton, MA 01063, United States of America

### Legend of supplementary figures and tables

- Figure S1** Photomicrograph of collected solid sample after solubility tests of coamorphous system in aqueous medium.
- Figure S2** PXRD patterns of (a) crystalline tadalafil, (b) crystalline repaglinide and surface-scraped species of coamorphous tablet at 20 min (c) and 90 min (d) after intrinsic dissolution test.
- Figure S3** Photomicrographs of collected solid samples at different time points (5, 10, 15, 30, 60, 120, 180, 240, 360, 480 min) during supersaturated dissolution tests of coamorphous system in water.

### Tables

- Table S1** Calculation of HSPs and molar volume for tadalafil according to the Hoftyzer-Van Krevelen method.
- Table S2** Calculation of HSPs and molar volume for repaglinide according to the Hoftyzer-Van Krevelen method.
- Table S3** Resonance assignments of chemical shifts in Ss  $^{13}\text{C}$  NMR spectra of tadalafil in crystalline, amorphous, amorphous physical mixture and coamorphous system.
- Table S4** Resonance assignments of chemical shifts in Ss  $^{13}\text{C}$  NMR spectra of repaglinide in crystalline, amorphous, amorphous physical mixture and coamorphous system.
- Table S5** Area under the curve (*AUC*,  $\mu\text{g}\cdot\text{min}\cdot\text{ml}^{-1}$ ) of tadalafil and repaglinide in dissolution of crystalline, physical mixture and coamorphous system

**Fig. S1**

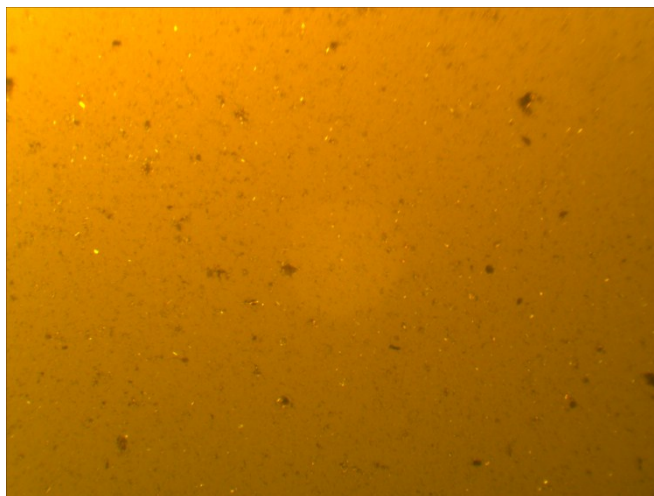

Fig. S2

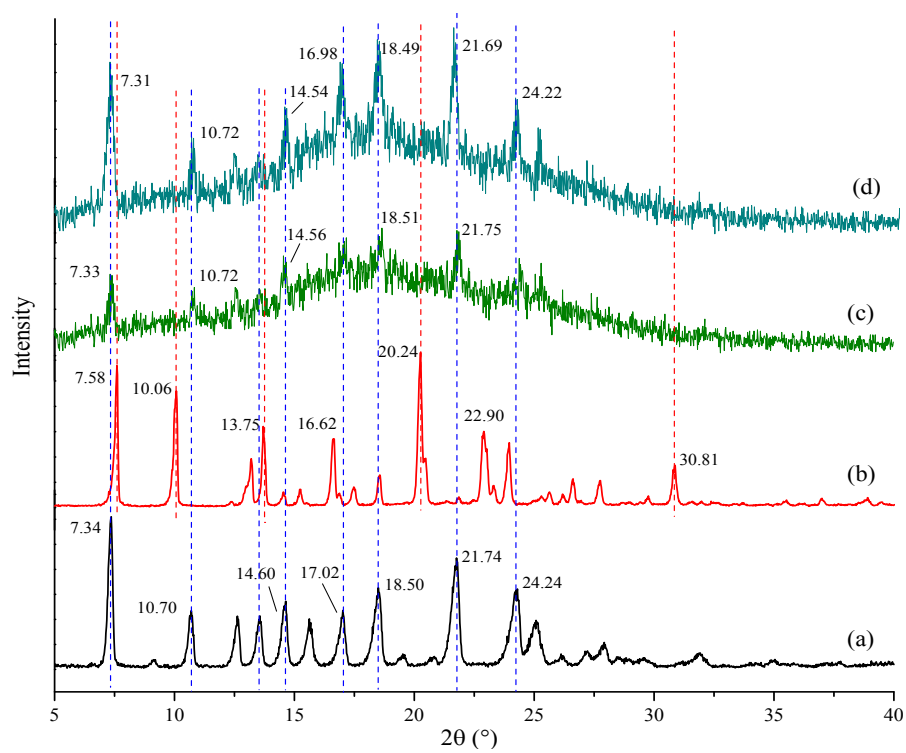

Fig. S3

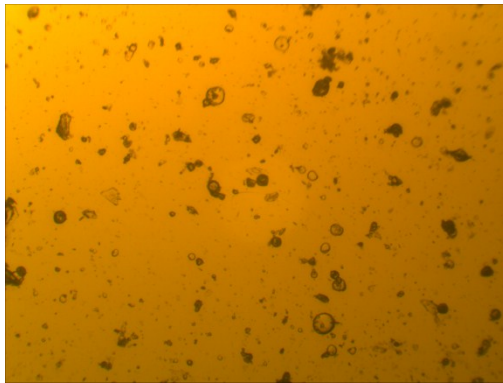

5 min

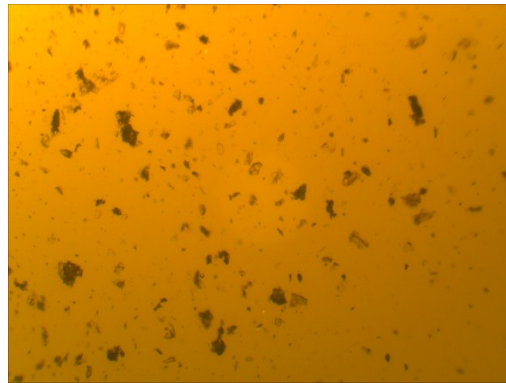

10 min

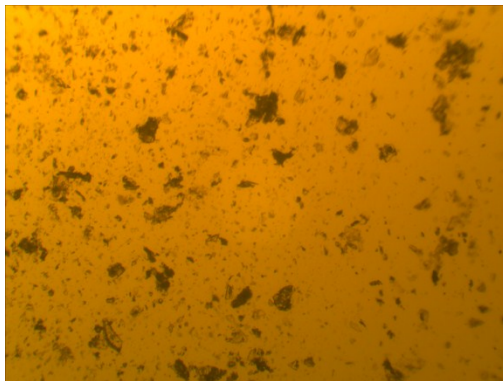

15 min

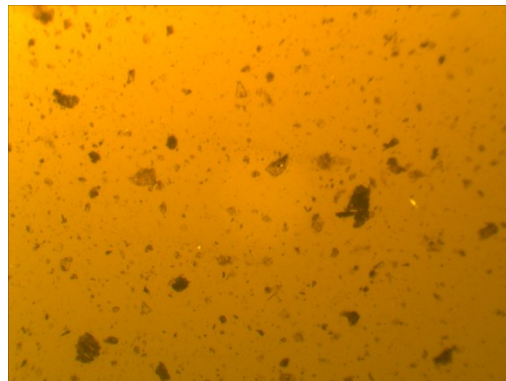

30 min

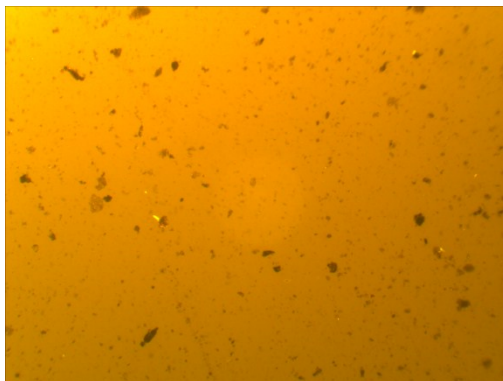

60 min

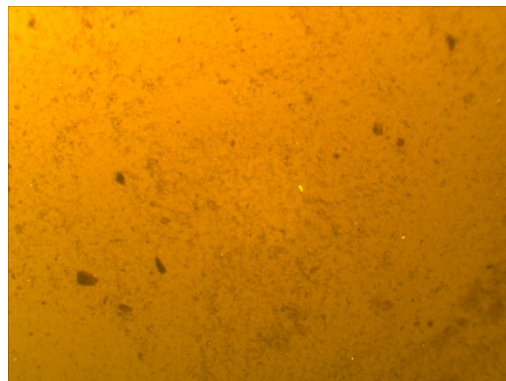

120 min

## Supplementary materials

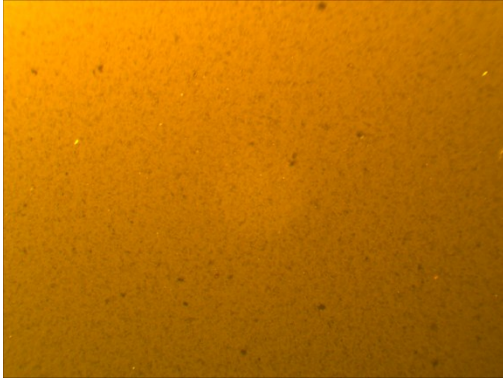

180 min

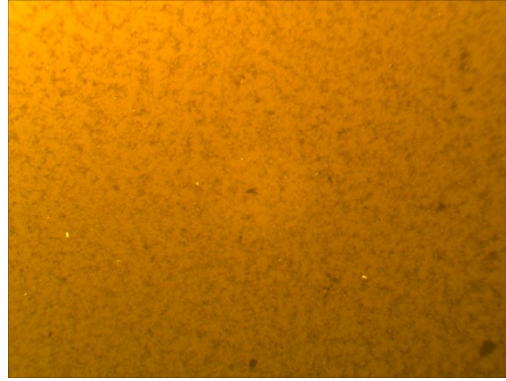

240 min

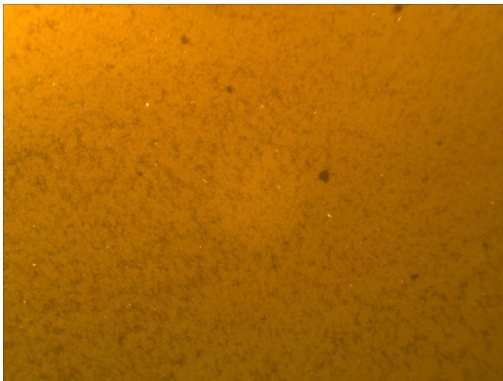

360 min

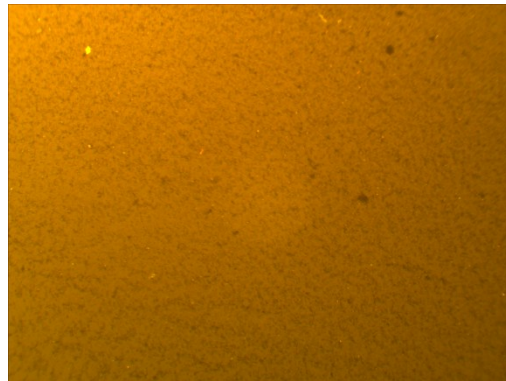

480 min

# Supplementary materials

**Table S1** Calculation of HSPs and molar volume for tadalafil according to the Hoftyzer-Van Krevelen method.

| Group                                                               | Frequency | $F_{d_i}$<br>( $J^{1/2} \text{ cm}^{3/2} \text{ mol}^{-1}$ ) | $F_{p_i}$<br>( $J^{1/2} \text{ cm}^{3/2} \text{ mol}^{-1}$ ) | $F_{p_i}^2$ | $E_{h_i}$ (J/mol) | $V_m$<br>( $\text{cm}^3/\text{mol}$ ) |
|---------------------------------------------------------------------|-----------|--------------------------------------------------------------|--------------------------------------------------------------|-------------|-------------------|---------------------------------------|
| CH3                                                                 | 1         | 420                                                          | 0                                                            | 0           | 0                 | 33.5                                  |
| -CH <sub>2</sub> -                                                  | 3         | 810                                                          | 0                                                            | 0           | 0                 | 48.3                                  |
| >CH-                                                                | 2         | 160                                                          | 0                                                            | 0           | 0                 | -2                                    |
| =CH-                                                                | 3         | 600                                                          | 0                                                            | 0           | 0                 | 40.5                                  |
| =C<                                                                 | 5         | 350                                                          | 0                                                            | 0           | 0                 | -27.5                                 |
| Phenylene (O, M, P)                                                 | 1         | 1270                                                         | 110                                                          | 12100       | 0                 | 52.4                                  |
| -O-                                                                 | 2         | 200                                                          | 800                                                          | 640000      | 6000              | 7.6                                   |
| -CO-                                                                | 2         | 580                                                          | 1540                                                         | 2371600     | 4000              | 21.6                                  |
| -NH-                                                                | 1         | 160                                                          | 210                                                          | 44100       | 3100              | 4.5                                   |
| >N-                                                                 | 2         | 40                                                           | 1600                                                         | 2560000     | 10000             | -18                                   |
| Ring closure 5 or more atoms                                        | 3         | 570                                                          | 0                                                            | 0           | 0                 | 48                                    |
| Ring closure 3 or 4 atoms                                           | 2         | 380                                                          |                                                              |             |                   | 36                                    |
| Conjugation in ring for each double bond                            | 4         |                                                              |                                                              |             |                   | -8.8                                  |
| Total                                                               |           | 5160                                                         |                                                              | 5627800     | 23100             | 236.1                                 |
| $\delta_d = \frac{\sum_i F_{d_i}}{\sum_i V_i}$                      |           | $21.86 MP_a^{0.5}$                                           |                                                              |             |                   |                                       |
| $\delta_p = \frac{\left(\sum_i F_{p_i}^2\right)^{0.5}}{\sum_i V_i}$ |           | $10.05 MP_a^{0.5}$                                           |                                                              |             |                   |                                       |
| $\delta_h = \left(\frac{\sum_i F_{h_i}}{\sum_i V_i}\right)^{0.5}$   |           | $9.89 MP_a^{0.5}$                                            |                                                              |             |                   |                                       |
| $\delta_t = (\delta_d^2 + \delta_p^2 + \delta_h^2)^{0.5}$           |           | $26.01 MP_a^{0.5}$                                           |                                                              |             |                   |                                       |

# Supplementary materials

**Table S2** Calculation of HSPs and molar volume for repaglinide according to the Hoftyzer-Van Krevelen method.

| Group                                                               | Frequency | $F_{d_i}$<br>(J <sup>1/2</sup> cm <sup>3/2</sup> mol <sup>-1</sup> ) | $F_{p_i}$<br>(J <sup>1/2</sup> cm <sup>3/2</sup> mol <sup>-1</sup> ) | $F_{p_i}^2$ | $E_{h_i}$ (J/mol) | $V_m$<br>(cm <sup>3</sup> /mol) |
|---------------------------------------------------------------------|-----------|----------------------------------------------------------------------|----------------------------------------------------------------------|-------------|-------------------|---------------------------------|
| -CH <sub>3</sub>                                                    | 3         | 1260                                                                 | 0                                                                    | 0           | 0                 | 100.5                           |
| -CH <sub>2</sub> -                                                  | 8         | 2160                                                                 | 0                                                                    | 0           | 0                 | 128.8                           |
| >CH-                                                                | 2         | 160                                                                  | 0                                                                    | 0           | 0                 | -2                              |
| =CH-                                                                | 3         | 600                                                                  | 0                                                                    | 0           | 0                 | 40.5                            |
| =C<                                                                 | 3         | 210                                                                  | 0                                                                    | 0           | 0                 | -16.5                           |
| Phenylene (O, M, P)                                                 | 1         | 1270                                                                 | 110                                                                  | 12100       | 0                 | 52.4                            |
| -O-                                                                 | 1         | 100                                                                  | 400                                                                  | 160000      | 3000              | 3.8                             |
| -CO-                                                                | 2         | 580                                                                  | 1540                                                                 | 2371600     | 4000              | 21.6                            |
| -NH-                                                                | 1         | 160                                                                  | 210                                                                  | 44100       | 3100              | 4.5                             |
| -N<                                                                 | 1         | 20                                                                   | 800                                                                  | 640000      | 5000              | -9                              |
| OH                                                                  | 1         | 210                                                                  | 0                                                                    | 0           | 0                 | 48                              |
| Ring closure 5 or more<br>atoms                                     | 3         | 570                                                                  | 0                                                                    | 0           | 0                 | 48                              |
| Conjugation in ring for each<br>double bond                         | 4         |                                                                      |                                                                      |             |                   | -8.8                            |
| Total                                                               |           | 7300                                                                 |                                                                      | 3477800     | 35100             | 373.8                           |
| $\delta_d = \frac{\sum_i F_{d_i}}{\sum_i V_i}$                      |           | $19.53 MP_a^{0.5}$                                                   |                                                                      |             |                   |                                 |
| $\delta_p = \frac{\left(\sum_i F_{p_i}^2\right)^{0.5}}{\sum_i V_i}$ |           | $4.99 MP_a^{0.5}$                                                    |                                                                      |             |                   |                                 |
| $\delta_h = \left(\frac{\sum_i F_{h_i}}{\sum_i V_i}\right)^{0.5}$   |           | $9.69 MP_a^{0.5}$                                                    |                                                                      |             |                   |                                 |
| $\delta_t = (\delta_d^2 + \delta_p^2 + \delta_h^2)^{0.5}$           |           | $22.36 MP_a^{0.5}$                                                   |                                                                      |             |                   |                                 |



## Supplementary materials

**Table S3** Resonance assignments of chemical shifts in Ss  $^{13}\text{C}$  NMR spectra of tadalafil in crystalline, amorphous, amorphous physical mixture and coamorphous system

| Carbon Number | Chemical shift (ppm)  |                     |                            |                    |
|---------------|-----------------------|---------------------|----------------------------|--------------------|
|               | Crystalline tadalafil | Amorphous tadalafil | Amorphous physical mixture | Coamorphous system |
| 29            | 167.74                | 167.06              | 167.45                     | 167.45             |
| 27            | 164.70                |                     |                            |                    |
| 5             | 148.19                | 147.08              | 147.05                     | 147.08             |
| 4             | 146.67                |                     |                            |                    |
| 15, 17        | 139.09                | 136.59              | 136.59                     | 136.59             |
| 7             | 135.38                | 134.02              | 133.03                     | 133.63             |
| 18            | 126.62                | 126.11              | 126.05                     | 126.31             |
| 20            | 122.75                | 119.58              | 120.17                     | 120.37             |
| 9             | 119.21                |                     |                            |                    |
| 21            | 118.03                |                     |                            |                    |
| 19            | 116.01                |                     |                            |                    |
| 22            | 115.84                |                     |                            |                    |
| 8             | 110.78                | 110.68              | 110.88                     | 111.08             |
| 6             | 107.92                | 107.12              | 107.12                     | 107.12             |
| 14            | 105.73                |                     |                            |                    |
| 2             | 101.35                | 100.79              | 100.39                     | 100.98             |
| 10, 12        | 56.86                 | 56.08               | 55.29                      | 55.69              |
| 24            | 50.29                 | 51.73               | 51.93                      | 52.13              |
| 28            | 32.42                 | 32.74               | 32.54                      | 32.94              |
| 13            | 24.50                 | 23.64               | 24.83                      | 25.22              |

## Supplementary materials

**Table S4** Resonance assignments of chemical shifts in Ss  $^{13}\text{C}$  NMR spectra of repaglinide in crystalline, amorphous, amorphous physical mixture and coamorphous system

| Carbon Number | Chemical shift (ppm)    |                       |                            |                    |
|---------------|-------------------------|-----------------------|----------------------------|--------------------|
|               | Crystalline repaglinide | Amorphous repaglinide | Amorphous physical mixture | Coamorphous system |
| 15            | 169.60                  | 170.59                | 170.22                     | 170.03             |
| 31            | 167.30                  |                       |                            |                    |
| 23            | 159.29                  | 157.88                | 157.76                     | 157.76             |
| 7             | 152.62                  | 152.35                | 152.22                     | 152.23             |
| 21            | 143.64                  | 142.13                | 141.54                     | 141.74             |
| 25            | 136.84                  | 132.96                | 133.03                     | 133.63             |
| 9             | 134.90                  |                       |                            |                    |
| 8             | 130.29                  |                       |                            |                    |
| 11            | 126.65                  | 127.24                | 126.50                     | 126.31             |
| 10            | 125.44                  | 124.63                | -                          | -                  |
| 26            | 122.04                  | 121.54                | -                          | -                  |
| 24            | 119.25                  |                       |                            |                    |
| 12            | 116.70                  | 115.68                | -                          | -                  |
| 22            | 114.88                  |                       |                            |                    |
| 29            | 61.74                   | 65.64                 | 65.58                      | 65.18              |
| 2, 6          | 58.47                   | 55.01                 | 55.29                      | 55.69              |
| 13            | 52.76                   |                       |                            |                    |
| 20            | 47.91                   | 46.18                 | 45.99                      | 45.79              |
| 17            | 44.99                   |                       |                            |                    |
| 3, 5          | 26.56                   | 25.27                 | 24.83                      | 25.22              |
| 4, 18         | 24.25                   |                       |                            |                    |
| 19, 27        | 19.52                   |                       |                            |                    |
| 30            | 13.94                   | 14.73                 | 14.35                      | 14.15              |

## Supplementary materials

**Table S5** Area under the curve (*AUC*,  $\mu\text{g}\cdot\text{min}\cdot\text{ml}^{-1}$ ) of tadalafil and repaglinide in dissolution of crystalline, physical mixture and coamorphous system

| Drug        | System             | Water   | PBS 6.8  |
|-------------|--------------------|---------|----------|
| Tadalafil   | Crystalline        | 1188.28 | 1278.08  |
|             | Physical mixture   | 1246.57 | 1364.22  |
|             | Coamorphous system | 2377.51 | 1826.72  |
| Repaglinide | Crystalline        | 2730.97 | 9736.38  |
|             | Physical mixture   | 2601.45 | 8174.68  |
|             | Coamorphous system | 7678.31 | 37064.96 |

### **Protocol of Principal component analysis (PCA) by SPSS**

- (1) Open the SPSS software and import the original data (i.e. wavenumber-transmittance for FTIR original data).
- (2) Open the “Factor analysis” module: Analysis-Dimensionality reduction-Factor analysis.
- (3) Open the “Factor analysis” interface and put the original variables that need to participate in the analysis into the “Variables” box.
- (4) Click “Descriptives” button, open the “Factor analysis: Descriptives” dialog box: choose “KMO and Bartlett’s test of sphericity” in the “Correlation Matrix” module, click “Continue” button.
- (5) Click “Extraction” button, open the “Factor analysis: Extraction” dialog box: choose “Principal components” in the “Method” module and set the “Eigenvalues” in the “Extract” module according to your demand, click “Continue” button.
- (6) The values of parameters on other modules such as “Scores” and “Options” are default and you can adjust them to satisfy your analysis requirement.
- (7) After parameters are set, click “OK” button in the “Factor analysis” interface to perform factor analysis. The principal components (PCs) of original data are extracted and listed in the table of “Total Variance Explained”.
- (8) Two principal components (PCs) are chosen to plot using the eigenvalues of the selected PCs, which could explain 95% of the variance in the original data.
- (9) The score plot of the PCA analysis is obtained.
